# Supplementary material for: Physical Protection of Soil Carbon Stocks Under Regenerative Agriculture
Source: Copernicus journal article supplement (doi:10.5194/egusphere-2024-4029), 2025-01-22
Supplement: Supplementary file 1 [file egusphere-2024-4029-supplement.pdf]

# Physical Protection of Soil Carbon Stocks Under Regenerative Agriculture

Sam G. Keenor <sup>1</sup>, and Brian J. Reid<sup>1\*</sup>

<sup>1</sup>School of Environmental Sciences, University of East Anglia, Norwich, NR4 7TJ, UK.

\*Corresponding author: e-mail: [b.reid@uea.ac.uk](mailto:b.reid@uea.ac.uk) Tel: +44(0)1603 592357

ORCID-ID: Sam G. Keenor <https://orcid.org/0000-0001-8620-8133>

ORCID-ID: Brian J. Reid <https://orcid.org/0000-0002-9613-979X>

## Supporting Information

|               | 2014/15      | 2015/16 | 2016/17      | 2017/18 | 2018/19      | 2019/20 | 2020/21      |
|---------------|--------------|---------|--------------|---------|--------------|---------|--------------|
| Control Field | Wheat        | Barley  | Wheat        | Barley  | Wheat        | Barley  | Wheat        |
| Year 1 Field  | Wheat        | Barley  | Wheat        | Barley  | Wheat        | Barley  | Blackcurrant |
| Year 3 Field  | Blackcurrant |         |              | Wheat   | Blackcurrant |         |              |
| Year 5 Field  | Blackcurrant |         | Blackcurrant |         |              |         |              |
| Year 7 Field  | Blackcurrant |         |              |         |              |         |              |

**Figure SI 1:** Field cropping history for the arable control, and regenerative blackcurrant fields (2014-2021). Discrete Boxes represent one full cropping cycle and where applicable re-planting of new bushes.

**Table SI 1:** Soil texture classification and relative proportion of sand, NWSA and WSA (%) ( $n=5$ ) of alley (white) and bush (grey) regimes with increasing years of establishment. Error bars represent  $\pm 1SD$ . For a given regime (alley or bush) dissimilar lower-case letters indicate significant ( $p \leq 0.05$ ) differences across the timeseries. At a given timepoint, the \* indicates a significant difference ( $p \leq 0.05$ ), between the alley and bush regimes, \*\* indicates a significant difference ( $p \leq 0.01$ ), between the alley and bush regimes.

| Field Site                 | Sand %                   | NWSA %                      | WSA %                    | Soil Texture Classification |
|----------------------------|--------------------------|-----------------------------|--------------------------|-----------------------------|
| Control Alley              | 66.5 $\pm$ 1.7 <b>a</b>  | 27.6 $\pm$ 1.8 <b>a</b>     | 5.8 $\pm$ 0.7 <b>a</b>   | Sandy Loam                  |
| Control Bush               | 66.5 $\pm$ 1.7 <b>a</b>  | 27.6 $\pm$ 1.8 <b>a</b>     | 5.8 $\pm$ 0.7 <b>a</b>   | Sandy Loam                  |
| Blackcurrants Year 1 Alley | 74.4 $\pm$ 1.2 <b>b</b>  | 16.5 $\pm$ 1.0 <b>b</b>     | 9.2 $\pm$ 1.0 <b>ab</b>  | Sandy Loam                  |
| Blackcurrants Year 1 Bush  | 76.4 $\pm$ 2.8 <b>b</b>  | 15.2 $\pm$ 1.3 <b>c</b>     | 8.5 $\pm$ 3.9 <b>ab</b>  | Sandy Loam                  |
| Blackcurrants Year 3 Alley | 76.5 $\pm$ 3.1 <b>b</b>  | 15.6 $\pm$ 1.0 <b>b</b>     | 7.8 $\pm$ 2.8 <b>ab</b>  | Sandy Loam                  |
| Blackcurrants Year 3 Bush  | 77.4 $\pm$ 1.9 <b>b</b>  | 17.1 $\pm$ 2.0 <b>bc</b>    | 5.4 $\pm$ 2.2 <b>a</b>   | Sandy Loam                  |
| Blackcurrants Year 5 Alley | 73.8 $\pm$ 3.1 <b>b</b>  | 15.9 $\pm$ 1.4 <b>b</b> **  | 10.3 $\pm$ 2.5 <b>b</b>  | Sandy Loam                  |
| Blackcurrants Year 5 Bush  | 70.2 $\pm$ 2.9 <b>a</b>  | 18.8 $\pm$ 0.9 <b>bc</b> ** | 11.0 $\pm$ 2.2 <b>bc</b> | Sandy Loam                  |
| Blackcurrants Year 7 Alley | 71.4 $\pm$ 2.6 <b>ab</b> | 12.6 $\pm$ 1.6 <b>c</b> **  | 16.0 $\pm$ 1.2 <b>c</b>  | Sandy Loam                  |
| Blackcurrants Year 7 Bush  | 69.5 $\pm$ 1.9 <b>a</b>  | 16.1 $\pm$ 0.8 <b>bc</b> ** | 14.4 $\pm$ 1.7 <b>c</b>  | Sandy Loam                  |

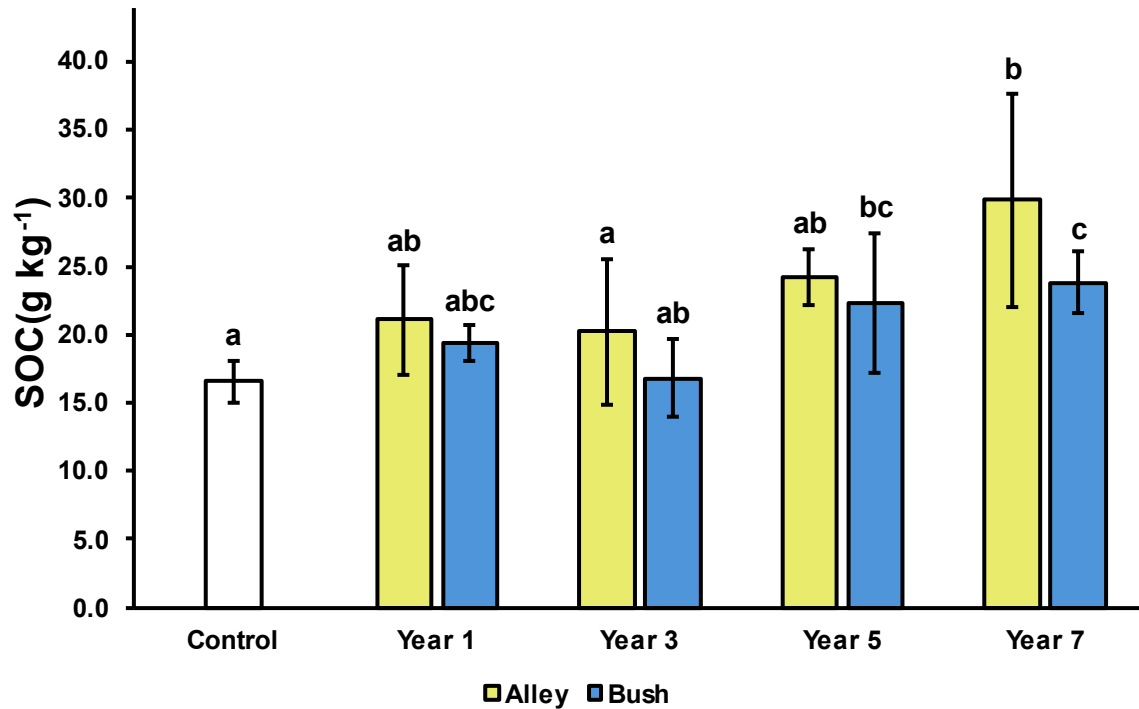

**Figure SI2:** SOC (n=5) of alley (yellow) and bush (blue) regimes with increasing years of establishment. Error bars represent  $\pm$  1SD. For a given regime (alley or bush) dissimilar lower-case letters indicate significant ( $p \leq 0.05$ ) differences across the timeseries. At a given timepoint, \* indicates a significant difference ( $p < 0.05$ ) between the alley and bush regimes.

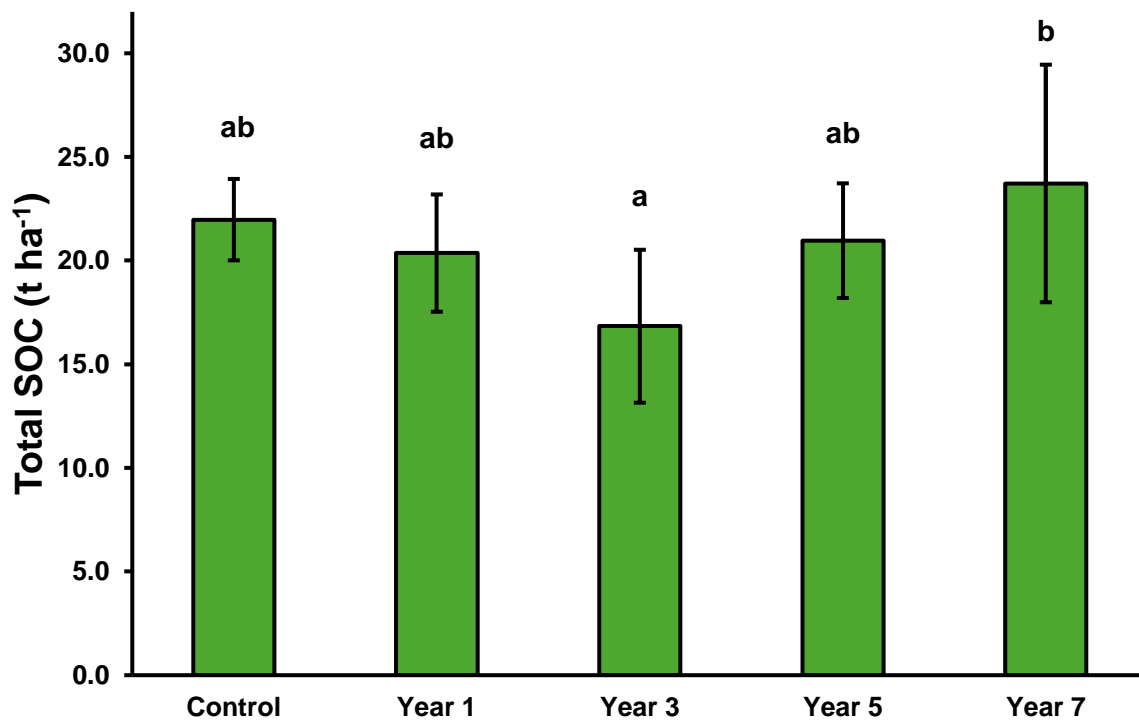

**Figure SI 3:** Total carbon field stocks (n=5), Error bars represent + 1SD. Dissimilar lower-case letters indicate significant ( $p \leq 0.05$ ) differences across the timeseries
